# Supplementary material for: Molecular design of ionic liquids as novel non-metal catalysts for the acetylene hydrochlorination reaction
Source: Royal Society of Chemistry journal article supplement (doi:10.1039/c9cp01151j), 2019-01-01
Supplement: c9cp01151j1.pdf [file c9cp01151j1.pdf]

## Supporting information

### **Molecular design of ionic liquids as novel nonmetallic catalysts used in acetylene hydrochlorination reaction**

Yao Nian,<sup>a</sup> Jinli Zhang,<sup>a,b</sup> Xiaoyan Li,<sup>c</sup> Yan Wang,<sup>a</sup> Wei Li,<sup>a</sup> Pewee Dato Kolubah<sup>a</sup>  
and You Han<sup>\*a,d</sup>

*Correspondence to: You Han, E-mail: [yhan@tju.edu.cn](mailto:yhan@tju.edu.cn) Phone: +86-022-27404495*

<sup>a</sup> *School of Chemical Engineering and Technology, Tianjin University, Tianjin 300072, China*

<sup>b</sup> *School of Chemistry and Chemical Engineering, Shihezi University, Shihezi 832003, P. R. China*

<sup>c</sup> *Chemical Engineering Department, Tianjin University Renai College, Tianjin 301636, P.R. China*

<sup>d</sup> *Tianjin Key Laboratory of Membrane Science and Desalination Technology, Tianjin University, Tianjin 300072, China*

**Table S1a.** IR Spectra of TPPB

| Calculations ( $\nu/\text{cm}^{-1}$ ) | Experiments ( $\nu/\text{cm}^{-1}$ ) | Assignments <sup>1-5</sup> |
|---------------------------------------|--------------------------------------|----------------------------|
| 528                                   | 521                                  | $\sigma$ C-P               |
| 677                                   | 690                                  | $\gamma$ C-H               |
| 709                                   | 718                                  | w C-C                      |
| 741                                   | 745                                  | $\gamma$ C-H               |
| 768                                   | 761                                  | vas C-P                    |
| 982                                   | 991                                  | ring breathing             |
| 1071                                  | 1099                                 | r C-H                      |
| 1422                                  | 1437                                 | $\sigma$ C-H               |
| 1517                                  | 1477                                 | $\sigma$ C-H               |
| 1571                                  | 1578                                 | $\nu$ C=C                  |
| 2924                                  |                                      | $\nu$ C-H                  |
| 3094                                  | 3036                                 | $\nu$ C-H                  |

Noted: Frequency was calculated at B3LYP/6-311G(d,p) and frequency correction factor was set as 0.9682<sup>6</sup>.

**Table S1b.** IR Spectra of TPPC

| Calculations ( $\nu/\text{cm}^{-1}$ ) | Experiments ( $\nu/\text{cm}^{-1}$ ) | Assignments <sup>1-5</sup> |
|---------------------------------------|--------------------------------------|----------------------------|
| 528                                   | 528                                  | $\sigma$ C-P               |
| 677                                   | 692                                  | $\gamma$ C-H               |
| 709                                   | 723                                  | w C-C                      |
| 741                                   | 754                                  | $\gamma$ C-H               |
| 986                                   | 997                                  | ring breathing             |
| 1071                                  | 1107                                 | r C-H                      |
| 1320                                  | 1313                                 | r C-H                      |
| 1422                                  | 1439                                 | $\sigma$ C-H               |
| 1571                                  | 1583                                 | v C=C                      |
|                                       | 2854                                 | v C-H                      |
| 2903                                  |                                      | v C-H                      |
|                                       | 2954                                 | v C-H                      |
| 3094                                  | 3064                                 | v C-H                      |

**Table S1c.** IR Spectra of BuTPPB

| Calculations ( $\nu/\text{cm}^{-1}$ ) | Experiments ( $\nu/\text{cm}^{-1}$ ) | Assignments <sup>1-5</sup> |
|---------------------------------------|--------------------------------------|----------------------------|
| 496                                   | 494                                  | $\sigma$ C-P               |
| 528                                   | 532                                  | $\sigma$ C-P               |
| 687                                   | 690                                  | $\gamma$ C-H               |
| 709                                   | 721                                  | w C-C                      |
| 730                                   | 744                                  | $\gamma$ C-H               |
| 773                                   | 758                                  | vas C-P                    |
|                                       | 806                                  | r C-H                      |
| 1071                                  | 1093                                 | r C-H                      |
| 1422                                  | 1437                                 | $\sigma$ C-H               |
| 2881                                  | 2865                                 | v C-H                      |
| 2903                                  | 2885                                 | v C-H                      |
| 2956                                  | 2958                                 | v C-H                      |
| 2999                                  | 3004                                 | v C-H                      |
|                                       | 3051                                 | v C-H                      |
| 3094                                  | 3074                                 | v C-H                      |

**Table S1d.** IR Spectra of TPPT

| Calculations ( $\nu/\text{cm}^{-1}$ ) | Experiments ( $\nu/\text{cm}^{-1}$ ) | Assignments <sup>1-5</sup>        |
|---------------------------------------|--------------------------------------|-----------------------------------|
| 517                                   | 528                                  | $\sigma$ C-P                      |
| 687                                   | 691                                  | $\sigma$ C-P, $\nu$ $\text{BF}_4$ |
| 709                                   | 724                                  | w C-C                             |
| 741                                   | 750                                  | $\gamma$ C-H, $\nu$ $\text{BF}_4$ |
| 932                                   | 916                                  | $\gamma$ C-H, $\nu$ $\text{BF}_4$ |
| 1007                                  | 999                                  | ring breathing                    |
| 1081                                  | 1069                                 | r C-H                             |
| 1124                                  | 1125                                 | r C-H, $\nu$ $\text{BF}_4$        |
| 1177                                  | 1195                                 | r C-H                             |
| 1422                                  | 1436                                 | $\sigma$ C-H                      |
| 1571                                  |                                      | $\nu$ C=C                         |
| 3094                                  | 3105                                 | $\nu$ C-H                         |
| 3235                                  | 3265                                 | $\nu$ C-H                         |

**Table S2a.** Mulliken charge changes in the adsorption configuration

| <b>Configuration</b>                           | <b>Group</b>                     | <b>TPPB</b> | <b>TPPC</b> | <b>BuTPPB</b> | <b>TPPT</b> |
|------------------------------------------------|----------------------------------|-------------|-------------|---------------|-------------|
| Adsorption of HCl                              | HCl                              | -0.188      | -0.210      | -0.185        | -0.079      |
|                                                | IL anion                         | 0.110       | 0.128       | 0.118         | 0.047       |
|                                                | IL cation                        | 0.078       | 0.082       | 0.067         | 0.032       |
| Adsorption of C <sub>2</sub> H <sub>2</sub>    | C <sub>2</sub> H <sub>2</sub>    | -0.037      | -0.025      | -0.043        | -0.038      |
|                                                | IL anion                         | 0.020       | 0.014       | 0.027         | 0.037       |
|                                                | IL cation                        | 0.017       | 0.011       | 0.016         | 0.001       |
| Adsorption of C <sub>2</sub> H <sub>3</sub> Cl | C <sub>2</sub> H <sub>3</sub> Cl | -0.040      | -0.021      | -0.039        | -0.049      |
|                                                | IL anion                         | 0.010       | -0.028      | 0.012         | 0.032       |
|                                                | IL cation                        | 0.030       | 0.049       | 0.027         | 0.017       |

Note: Positive value means losing electrons; Negative value means getting electrons.

**Table S2b.** NPA charge changes in the adsorption configuration

| <b>Configuration</b>                           | <b>Group</b>                     | <b>TPPB</b> | <b>TPPC</b> | <b>BuTPPB</b> | <b>TPPT</b> |
|------------------------------------------------|----------------------------------|-------------|-------------|---------------|-------------|
| Adsorption of HCl                              | HCl                              | -0.187      | -0.221      | -0.179        | -0.052      |
|                                                | IL anion                         | 0.131       | 0.164       | 0.133         | 0.041       |
|                                                | IL cation                        | 0.056       | 0.057       | 0.046         | 0.011       |
| Adsorption of C <sub>2</sub> H <sub>2</sub>    | C <sub>2</sub> H <sub>2</sub>    | -0.026      | -0.026      | -0.026        | -0.017      |
|                                                | IL anion                         | -0.002      | 0.002       | 0.005         | 0.013       |
|                                                | IL cation                        | 0.028       | 0.024       | 0.021         | 0.004       |
| Adsorption of C <sub>2</sub> H <sub>3</sub> Cl | C <sub>2</sub> H <sub>3</sub> Cl | -0.011      | -0.012      | -0.012        | -0.009      |
|                                                | IL anion                         | -0.013      | -0.009      | -0.005        | 0.004       |
|                                                | IL cation                        | 0.024       | 0.021       | 0.017         | 0.005       |

**Table S2c.** Hirshfeld charge changes in the adsorption configuration

| <b>Configuration</b>                           | <b>Group</b>                     | <b>TPPB</b> | <b>TPPC</b> | <b>BuTPPB</b> | <b>TPPT</b> |
|------------------------------------------------|----------------------------------|-------------|-------------|---------------|-------------|
| Adsorption of HCl                              | HCl                              | -0.233      | -0.264      | -0.221        | -0.101      |
|                                                | IL anion                         | 0.158       | 0.185       | 0.168         | 0.096       |
|                                                | IL cation                        | 0.065       | 0.079       | 0.053         | 0.005       |
| Adsorption of C <sub>2</sub> H <sub>2</sub>    | C <sub>2</sub> H <sub>2</sub>    | -0.076      | -0.085      | -0.083        | -0.046      |
|                                                | IL anion                         | 0.048       | 0.060       | 0.060         | 0.056       |
|                                                | IL cation                        | 0.028       | 0.025       | 0.023         | -0.010      |
| Adsorption of C <sub>2</sub> H <sub>3</sub> Cl | C <sub>2</sub> H <sub>3</sub> Cl | -0.044      | -0.056      | -0.046        | -0.031      |
|                                                | IL anion                         | 0.034       | 0.048       | 0.045         | 0.041       |
|                                                | IL cation                        | 0.010       | 0.008       | 0.001         | -0.010      |

**Table S3.** Relative energies during reaction processes and reaction activation energies

| <b>Structure</b> | <b>Co-ads</b> | <b>IM</b> | <b>TS</b> | <b>Pr-ads</b> | <b>Pr</b> | <b>Energy Barrier</b> | <b>Activation Energy (<math>\Delta G_{453}</math>)</b> |
|------------------|---------------|-----------|-----------|---------------|-----------|-----------------------|--------------------------------------------------------|
| TPPB             | 0             | 58.85     | 118.59    | -47.99        | -30.89    | 59.73                 | 85.65                                                  |
| TPPC             | 0             | 47.44     | 115.91    | -41.93        | -23.78    | 68.47                 | 92.13                                                  |
| BuTPPB           | 0             | 31.27     | 119.13    | -49.37        | -32.52    | 87.86                 | 118.67                                                 |
| TPPT             | 0             | 14.04     | 156.37    | -72.40        | -47.65    | 142.33                | 157.75                                                 |
| Without catalyst | 0             |           | 178.49    |               | -101.57   | 178.49                | 189.56                                                 |

**Table S4.** The catalytic performance of non-metal catalyst for acetylene hydrochlorination recently reported in literatures.

| Catalyst                                         | Reaction conditions                                                                                                                          | Initial maximum C <sub>2</sub> H <sub>2</sub> conversion |
|--------------------------------------------------|----------------------------------------------------------------------------------------------------------------------------------------------|----------------------------------------------------------|
| SiC@N-C <sup>7</sup>                             | $T= 473 \text{ K. GHSV (C}_2\text{H}_2) = 30 \text{ h}^{-1}.$<br>$V_{\text{HCl}}/V_{\text{C}_2\text{H}_2} = 1.15$                            | 80.0%                                                    |
| g-C <sub>3</sub> N <sub>4</sub> /AC <sup>8</sup> | $T= 453 \text{ K. GHSV (C}_2\text{H}_2) = 50 \text{ h}^{-1}.$<br>$V_{\text{HCl}}/V_{\text{C}_2\text{H}_2} = 0.85$                            | 75.0%                                                    |
| N-OMC-700 <sup>9</sup>                           | $T= 473 \text{ K. GHSV (C}_2\text{H}_2) = 32 \text{ h}^{-1}.$<br>$V_{\text{HCl}}/V_{\text{C}_2\text{H}_2} = 1.15$                            | 77.0%                                                    |
| PANI-AC900 <sup>10</sup>                         | $T= 453 \text{ K. GHSV (C}_2\text{H}_2) = 36 \text{ h}^{-1}.$<br>$V_{\text{HCl}}/V_{\text{C}_2\text{H}_2} = 1.15$                            | 76.0%                                                    |
| Z4M1 <sup>11</sup>                               | $T= 453 \text{ K. GHSV (C}_2\text{H}_2) = 50 \text{ h}^{-1}.$<br>$V_{\text{HCl}}/V_{\text{C}_2\text{H}_2} = 1.15$                            | 60.0%                                                    |
| N-OMC-O2.0 <sup>12</sup>                         | $T= 180 \text{ K. GHSV (C}_2\text{H}_2) = 50 \text{ h}^{-1}.$<br>$V_{\text{HCl}}/V_{\text{C}_2\text{H}_2} = 1.1$                             | 34.0%                                                    |
| AC-n-U500 <sup>13</sup>                          | $T= 483 \text{ K. GHSV (C}_2\text{H}_2) = 50 \text{ h}^{-1}.$<br>$V_{\text{HCl}}/V_{\text{C}_2\text{H}_2} = 1.2$                             | 81.0%                                                    |
| ZIF-8/SAC <sup>14</sup>                          | $T= 220 \text{ K. GHSV (C}_2\text{H}_2) = 30 \text{ h}^{-1}.$<br>$V_{\text{HCl}}/V_{\text{C}_2\text{H}_2} = 1.15$                            | 81.0%                                                    |
| PDA/SiC-700 <sup>15</sup>                        | $T= 493 \text{ K. GHSV (C}_2\text{H}_2) = 0.08\text{ml}$<br>$\text{g}^{-1} \text{ min}^{-1}. V_{\text{HCl}}/V_{\text{C}_2\text{H}_2} = 1.15$ | 77%                                                      |
| NS-C-NH <sub>3</sub> <sup>16</sup>               | $T= 493 \text{ K. GHSV (C}_2\text{H}_2) = 35 \text{ h}^{-1}.$<br>$V_{\text{HCl}}/V_{\text{C}_2\text{H}_2} = 1.2$                             | 80%                                                      |
| p-BN <sup>17</sup>                               | $T= 553 \text{ K. GHSV (C}_2\text{H}_2) = 1.32$<br>$\text{mL min}^{-1} \text{ g}^{-1}. V_{\text{HCl}}/V_{\text{C}_2\text{H}_2} = 1.2$        | 99 %                                                     |
| 15%TPPB/SAC <sup>[this work]</sup>               | $T= 453 \text{ K. GHSV (C}_2\text{H}_2) = 50 \text{ h}^{-1}.$<br>$V_{\text{HCl}}/V_{\text{C}_2\text{H}_2} = 1.15$                            | 84.0%                                                    |

Note: The reaction temperature has a great influence on the C<sub>2</sub>H<sub>2</sub> conversion in acetylene hydrochlorination. The higher reaction temperature is, the higher C<sub>2</sub>H<sub>2</sub> conversion achieved.



**Table S5a.** Mulliken charge changes during acetylene hydrochlorination reaction

| Catalyst         | Group/<br>atom                | $\Delta$ Charge<br>(Co ads-free) | $\Delta$ Charge<br>(IM-Co ads) | $\Delta$ Charge<br>(TS-IM) | $\Delta$ Charge<br>(Pr-TS) |
|------------------|-------------------------------|----------------------------------|--------------------------------|----------------------------|----------------------------|
| TPPB<br>catalyst | H2                            | 0.043                            | -0.050                         | 0.058                      | -0.053                     |
|                  | C1                            | 0.029                            | -0.144                         | -0.013                     | 0.093                      |
|                  | C2                            | -0.080                           | 0.157                          | 0.059                      | -0.245                     |
|                  | H3                            | -0.014                           | 0.057                          | 0.062                      | -0.067                     |
|                  | C <sub>2</sub> H <sub>2</sub> | -0.022                           | 0.020                          | 0.166                      | -0.272                     |
|                  | Cl1                           | -0.195                           | -0.431                         | 0.044                      | 0.638                      |
|                  | H1                            | 0.028                            | -0.050                         | 0.074                      | -0.038                     |
|                  | HCl                           | -0.167                           | -0.481                         | 0.118                      | 0.600                      |
|                  | IL anion                      | 0.102                            | 0.483                          | -0.330                     | -0.245                     |
|                  | IL cation                     | 0.087                            | -0.022                         | 0.046                      | -0.083                     |
|                  | IL                            | 0.189                            | 0.461                          | -0.284                     | -0.328                     |
| TPPC<br>catalyst | H2                            | 0.062                            | -0.067                         | 0.049                      | -0.052                     |
|                  | C1                            | 0.031                            | -0.149                         | -0.040                     | 0.116                      |
|                  | C2                            | -0.083                           | 0.159                          | 0.046                      | -0.229                     |
|                  | H3                            | -0.014                           | 0.056                          | 0.050                      | -0.056                     |
|                  | C <sub>2</sub> H <sub>2</sub> | -0.004                           | -0.001                         | 0.105                      | -0.221                     |
|                  | Cl1                           | -0.229                           | -0.392                         | 0.045                      | 0.626                      |
|                  | H1                            | 0.060                            | -0.022                         | 0.073                      | -0.062                     |
|                  | HCl                           | -0.169                           | -0.414                         | 0.118                      | 0.564                      |
|                  | IL anion                      | 0.085                            | 0.461                          | -0.291                     | -0.283                     |
|                  | IL cation                     | 0.088                            | -0.046                         | 0.068                      | -0.060                     |
|                  | IL                            | 0.173                            | 0.415                          | -0.223                     | -0.343                     |

|                    |                               |        |        |        |        |
|--------------------|-------------------------------|--------|--------|--------|--------|
| BuTPPB<br>catalyst | H2                            | 0.044  | -0.052 | 0.057  | -0.051 |
|                    | C1                            | 0.035  | -0.144 | -0.025 | 0.098  |
|                    | C2                            | -0.092 | 0.144  | 0.080  | -0.242 |
|                    | H3                            | -0.014 | 0.115  | 0.007  | -0.070 |
|                    | C <sub>2</sub> H <sub>2</sub> | -0.027 | 0.063  | 0.119  | -0.265 |
|                    | C11                           | -0.183 | -0.488 | 0.073  | 0.655  |
|                    | H1                            | 0.028  | -0.051 | 0.075  | -0.038 |
|                    | HCl                           | -0.155 | -0.539 | 0.148  | 0.617  |
|                    | IL anion                      | 0.114  | 0.473  | -0.316 | -0.259 |
|                    | IL cation                     | 0.068  | 0.003  | 0.049  | -0.093 |
| IL                 | 0.182                         | 0.476  | -0.267 | -0.352 |        |
| TPPT<br>catalyst   | H2                            | 0.055  | 0.014  | 0.063  | -0.108 |
|                    | C1                            | 0.024  | 0.014  | -0.048 | -0.054 |
|                    | C2                            | -0.098 | -0.008 | 0.242  | -0.229 |
|                    | H3                            | -0.015 | 0.003  | 0.094  | -0.040 |
|                    | C <sub>2</sub> H <sub>2</sub> | -0.034 | 0.023  | 0.351  | -0.431 |
|                    | C11                           | -0.141 | 0.051  | -0.412 | 0.551  |
|                    | H1                            | 0.068  | -0.037 | 0.044  | -0.082 |
|                    | HCl                           | -0.073 | 0.014  | -0.368 | 0.469  |
|                    | IL anion                      | 0.070  | -0.034 | 0.014  | -0.019 |
|                    | IL cation                     | 0.037  | -0.003 | 0.003  | -0.019 |
| IL                 | 0.107                         | -0.037 | 0.017  | -0.038 |        |

**Table S5b.** NPA charge changes during acetylene hydrochlorination reaction

| Catalyst         | Group/<br>atom                | $\Delta$ Charge<br>(Co ads-free) | $\Delta$ Charge<br>(IM-Co ads) | $\Delta$ Charge<br>(TS-IM) | $\Delta$ Charge<br>(Pr-TS) |
|------------------|-------------------------------|----------------------------------|--------------------------------|----------------------------|----------------------------|
| TPPB<br>catalyst | H2                            | 0.034                            | -0.031                         | 0.045                      | -0.068                     |
|                  | C1                            | 0.006                            | -0.093                         | -0.189                     | 0.125                      |
|                  | C2                            | -0.052                           | 0.083                          | 0.290                      | -0.307                     |
|                  | H3                            | -0.006                           | 0.056                          | -0.004                     | -0.078                     |
|                  | C <sub>2</sub> H <sub>2</sub> | -0.018                           | 0.014                          | 0.143                      | -0.328                     |
|                  | Cl1                           | -0.172                           | -0.466                         | 0.106                      | 0.720                      |
|                  | H1                            | 0.008                            | -0.035                         | 0.036                      | -0.019                     |
|                  | HCl                           | -0.165                           | -0.501                         | 0.142                      | 0.701                      |
|                  | IL anion                      | 0.117                            | 0.506                          | -0.309                     | -0.326                     |
|                  | IL cation                     | 0.065                            | -0.019                         | 0.024                      | -0.047                     |
|                  | IL                            | 0.183                            | 0.487                          | -0.285                     | -0.373                     |
| TPPC<br>catalyst | H2                            | 0.039                            | -0.035                         | 0.037                      | -0.065                     |
|                  | C1                            | 0.009                            | -0.097                         | -0.176                     | 0.113                      |
|                  | C2                            | -0.058                           | 0.084                          | 0.254                      | -0.266                     |
|                  | H3                            | -0.006                           | 0.057                          | -0.016                     | -0.069                     |
|                  | C <sub>2</sub> H <sub>2</sub> | -0.016                           | 0.009                          | 0.099                      | -0.286                     |
|                  | Cl1                           | -0.208                           | -0.428                         | 0.113                      | 0.710                      |
|                  | H1                            | 0.012                            | 0.025                          | -0.013                     | -0.028                     |
|                  | HCl                           | -0.196                           | -0.403                         | 0.100                      | 0.681                      |
|                  | IL anion                      | 0.149                            | 0.422                          | -0.224                     | -0.355                     |
|                  | IL cation                     | 0.064                            | -0.028                         | 0.025                      | -0.040                     |
|                  | IL                            | 0.212                            | 0.394                          | -0.199                     | -0.395                     |

|                    |                               |        |        |        |        |
|--------------------|-------------------------------|--------|--------|--------|--------|
| BuTPPB<br>catalyst | H2                            | 0.033  | -0.031 | 0.044  | -0.066 |
|                    | C1                            | 0.014  | -0.088 | -0.199 | 0.122  |
|                    | C2                            | -0.056 | 0.084  | 0.282  | -0.296 |
|                    | H3                            | -0.006 | 0.056  | -0.002 | -0.080 |
|                    | C <sub>2</sub> H <sub>2</sub> | -0.015 | 0.021  | 0.124  | -0.320 |
|                    | C11                           | -0.164 | -0.469 | 0.091  | 0.731  |
|                    | H1                            | 0.009  | -0.039 | 0.035  | -0.016 |
|                    | HCl                           | -0.155 | -0.508 | 0.126  | 0.715  |
|                    | IL anion                      | 0.118  | 0.517  | -0.291 | -0.350 |
|                    | IL cation                     | 0.052  | -0.030 | 0.040  | -0.045 |
|                    | IL                            | 0.170  | 0.487  | -0.251 | -0.395 |
| TPPT<br>catalyst   | H2                            | 0.473  | 0.018  | 0.061  | -0.109 |
|                    | C1                            | 0.030  | 0.015  | -0.252 | 0.075  |
|                    | C2                            | 0.016  | -0.024 | 0.437  | -0.344 |
|                    | H3                            | -0.052 | 0.012  | 0.028  | -0.064 |
|                    | C <sub>2</sub> H <sub>2</sub> | -0.007 | 0.022  | 0.274  | -0.442 |
|                    | C11                           | -0.099 | 0.037  | -0.392 | 0.635  |
|                    | H1                            | 0.052  | -0.019 | 0.096  | -0.158 |
|                    | HCl                           | -0.047 | 0.017  | -0.296 | 0.477  |
|                    | IL anion                      | 0.047  | -0.033 | 0.018  | -0.029 |
|                    | IL cation                     | 0.013  | -0.006 | 0.004  | -0.006 |
|                    | IL                            | 0.061  | -0.039 | 0.022  | -0.035 |

**Table S5c.** Hirshfeld charge changes during acetylene hydrochlorination reaction

| Catalyst         | Group/<br>atom                | $\Delta$ Charge<br>(Co ads-free) | $\Delta$ Charge<br>(IM-Co ads) | $\Delta$ Charge<br>(TS-IM) | $\Delta$ Charge<br>(Pr-TS) |
|------------------|-------------------------------|----------------------------------|--------------------------------|----------------------------|----------------------------|
| TPPB<br>catalyst | H2                            | -0.031                           | 0.023                          | 0.010                      | -0.042                     |
|                  | C1                            | 0.007                            | -0.023                         | 0.038                      | 0.000                      |
|                  | C2                            | -0.025                           | 0.048                          | 0.129                      | -0.082                     |
|                  | H3                            | -0.011                           | -0.027                         | 0.020                      | -0.029                     |
|                  | C <sub>2</sub> H <sub>2</sub> | -0.060                           | 0.020                          | 0.197                      | -0.153                     |
|                  | Cl1                           | -0.132                           | -0.348                         | 0.082                      | 0.439                      |
|                  | H1                            | -0.072                           | 0.022                          | -0.027                     | -0.013                     |
|                  | HCl                           | -0.204                           | -0.325                         | 0.055                      | 0.426                      |
|                  | IL anion                      | 0.190                            | 0.331                          | -0.251                     | -0.236                     |
|                  | IL cation                     | 0.074                            | -0.026                         | -0.001                     | -0.037                     |
|                  | IL                            | 0.264                            | 0.305                          | -0.252                     | -0.273                     |
| TPPC<br>catalyst | H2                            | -0.031                           | 0.023                          | 0.002                      | -0.037                     |
|                  | C1                            | 0.006                            | -0.019                         | 0.014                      | 0.019                      |
|                  | C2                            | -0.026                           | 0.051                          | 0.104                      | -0.060                     |
|                  | H3                            | -0.011                           | -0.027                         | 0.025                      | -0.036                     |
|                  | C <sub>2</sub> H <sub>2</sub> | -0.063                           | 0.029                          | 0.145                      | -0.114                     |
|                  | Cl1                           | -0.160                           | -0.320                         | 0.081                      | 0.438                      |
|                  | H1                            | -0.071                           | 0.042                          | -0.038                     | -0.025                     |
|                  | HCl                           | -0.231                           | -0.278                         | 0.043                      | 0.413                      |
|                  | IL anion                      | 0.212                            | 0.284                          | -0.187                     | -0.261                     |
|                  | IL cation                     | 0.082                            | -0.034                         | -0.001                     | -0.038                     |
|                  | IL                            | 0.294                            | 0.250                          | -0.188                     | -0.299                     |

|                    |                               |        |        |        |        |
|--------------------|-------------------------------|--------|--------|--------|--------|
| BuTPPB<br>catalyst | H2                            | -0.030 | 0.023  | 0.008  | -0.042 |
|                    | C1                            | 0.006  | -0.019 | 0.032  | 0.003  |
|                    | C2                            | -0.027 | 0.049  | 0.123  | -0.074 |
|                    | H3                            | -0.011 | -0.023 | 0.015  | -0.028 |
|                    | C <sub>2</sub> H <sub>2</sub> | -0.062 | 0.030  | 0.178  | -0.141 |
|                    | Cl1                           | -0.130 | -0.315 | 0.032  | 0.453  |
|                    | H1                            | -0.069 | 0.018  | -0.025 | -0.014 |
|                    | HCl                           | -0.199 | -0.297 | 0.007  | 0.439  |
|                    | IL anion                      | 0.203  | 0.342  | -0.235 | -0.264 |
|                    | IL cation                     | 0.058  | -0.075 | 0.050  | -0.034 |
| IL                 | 0.261                         | 0.267  | -0.185 | -0.298 |        |
| TPPT<br>catalyst   | H2                            | -0.017 | 0.004  | 0.013  | -0.036 |
|                    | C1                            | 0.004  | 0.033  | 0.048  | -0.059 |
|                    | C2                            | -0.029 | 0.024  | 0.213  | -0.138 |
|                    | H3                            | -0.012 | 0.007  | 0.031  | -0.071 |
|                    | C <sub>2</sub> H <sub>2</sub> | -0.054 | 0.068  | 0.305  | -0.304 |
|                    | Cl1                           | -0.066 | 0.041  | -0.325 | 0.383  |
|                    | H1                            | -0.028 | 0.000  | 0.002  | -0.053 |
|                    | HCl                           | -0.094 | 0.041  | -0.323 | 0.330  |
|                    | IL anion                      | 0.302  | -0.245 | 0.031  | -0.047 |
|                    | IL cation                     | -0.154 | 0.136  | -0.013 | 0.021  |
| IL                 | 0.148                         | -0.109 | 0.018  | -0.026 |        |

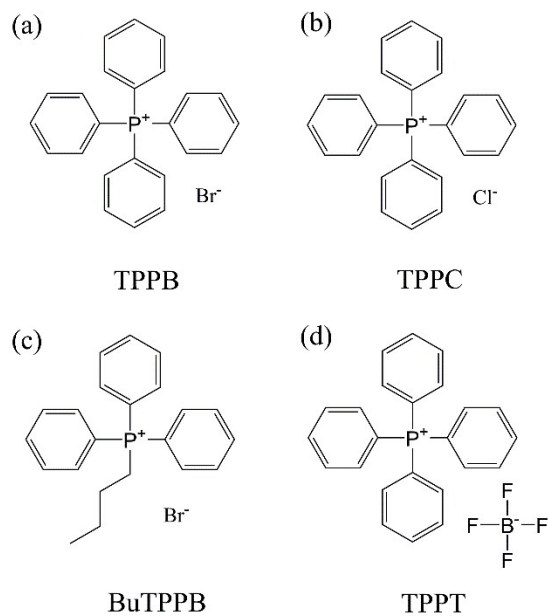

**Figure S1.** Structural formulas of (a) TPPB, (b) TPPC, (c) BuTPPB and (d) TPPT ILs.

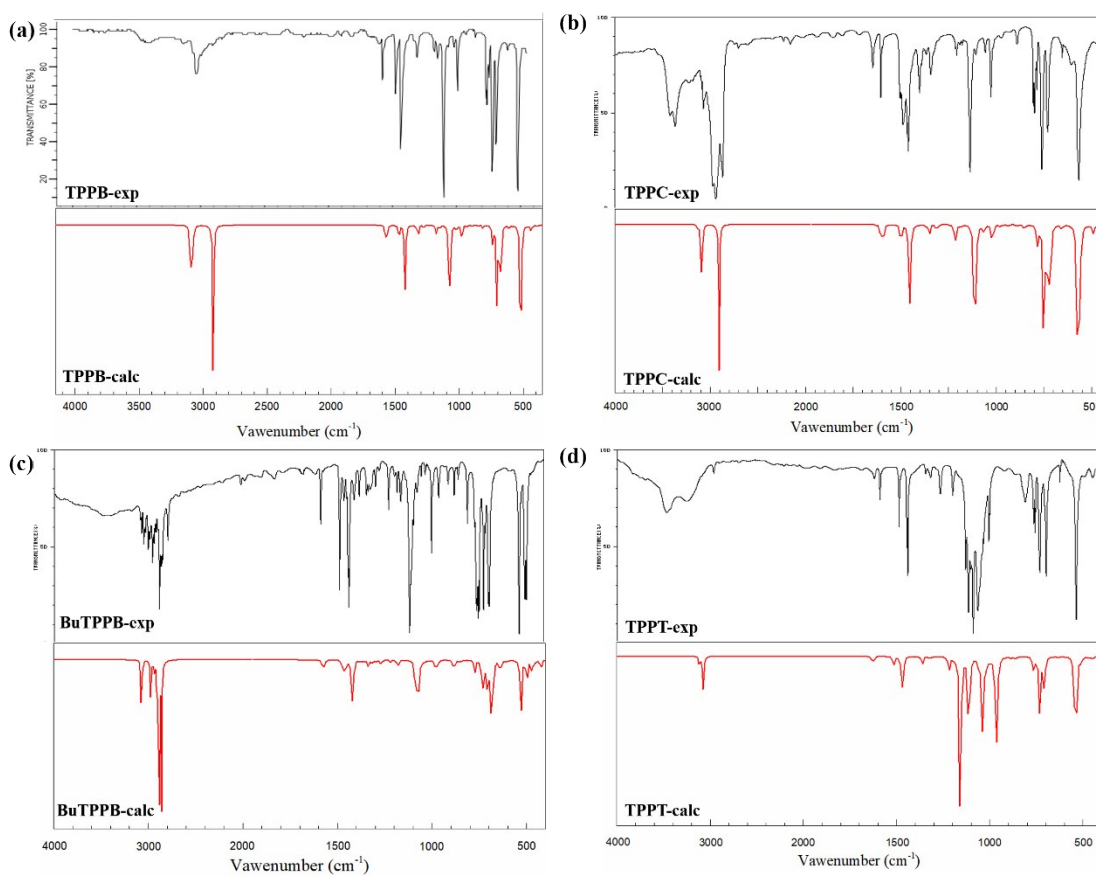

**Figure S2.** Calculated IR spectra and standard IR spectra for TPPB (a), TPPC (b), BuTPPB (c) and TPPT (d).

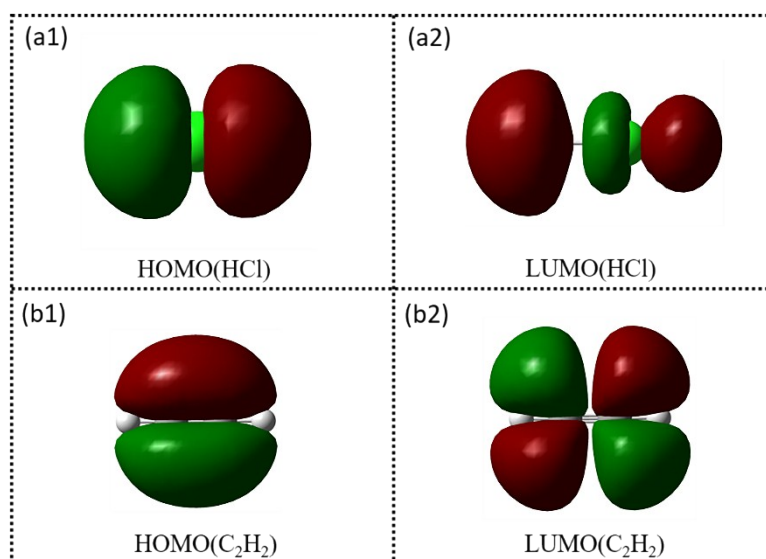

**Figure S3.** HOMO orbital of (a1) HCl, (b1) C<sub>2</sub>H<sub>2</sub> and LUMO orbital of (a2) HCl, (b2) C<sub>2</sub>H<sub>2</sub> (isosurface=0.05).

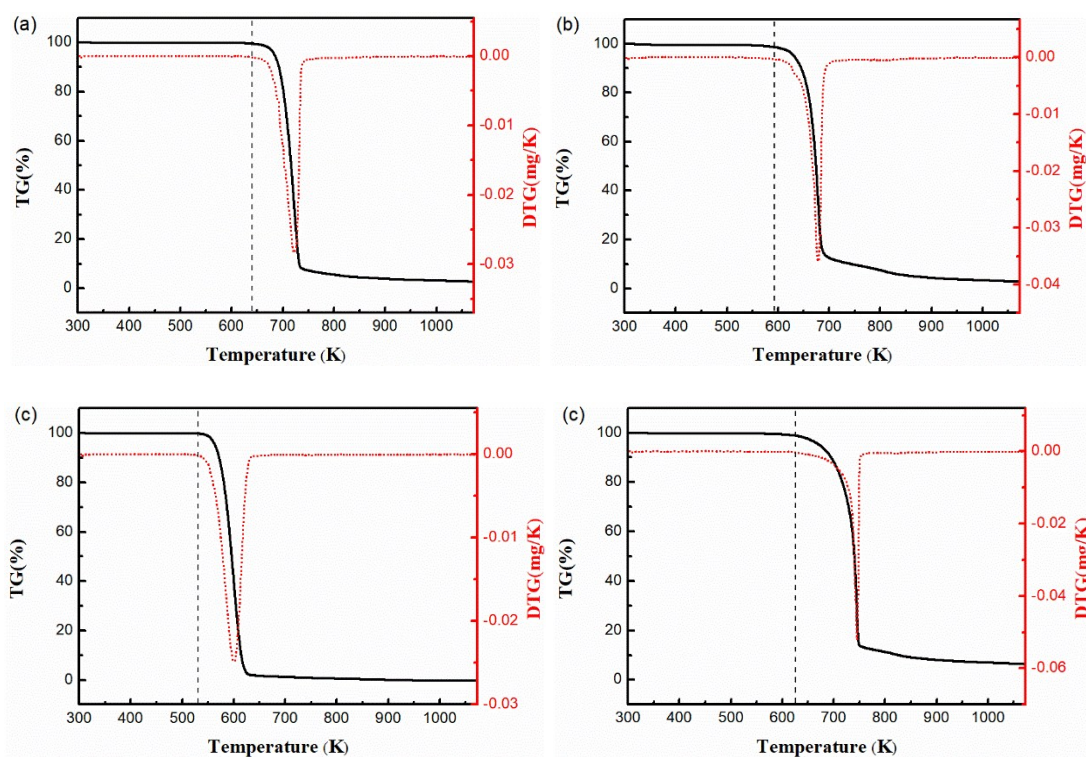

**Figure S4.** TGA curves of the TPPB (a), TPPC (b), BuTPPB (c) and TPPT (d).



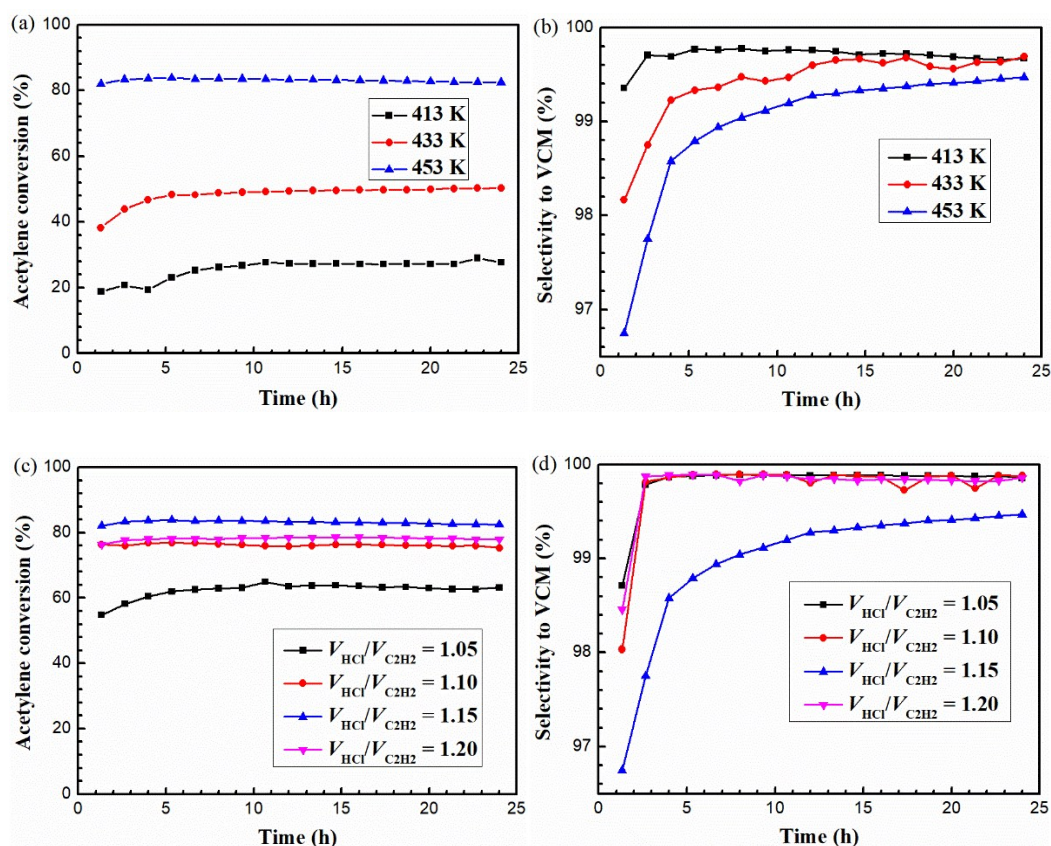

**Figure. S5** Conversion of acetylene (a) and selectivity to VCM (b) over 15%TPPB/SAC under different reaction temperature from 413 K to 453 K, with of  $GHSV(C_2H_2) = 50 \text{ h}^{-1}$  and  $V_{HCl}/V_{C_2H_2} = 1.15$ . Conversion of acetylene (c) and selectivity to VCM (d) over 15%TPPB/SAC under different  $V_{HCl}/V_{C_2H_2}$  from 1.05 to 1.20, with of Temperature = 453 K and  $GHSV(C_2H_2) = 50 \text{ h}^{-1}$ .

The effect of the pressure has not been considered and the effect of reaction temperature and HCl/C<sub>2</sub>H<sub>2</sub> feeding volume ratio ( $V_{HCl}/V_{C_2H_2}$ ) was investigated, as shown in Figure S5. Because the reaction temperature is 413 K in the industrial operations<sup>18, 19</sup>, the reaction temperatures of 413 K, 433 K and 453 K were chosen here. The acetylene conversion over 15%TPPB/SAC catalyst is increased with the reaction temperature, and the VCM selectivity

is above 99% after several hour reaction. Considering the energy consumption in the reaction as well as the general temperature used in the previous work, which was 443 K ~ 453 K<sup>20-22</sup>, the optimal temperature was set at 453 K.

The effect of  $V_{\text{HCl}}/V_{\text{C}_2\text{H}_2}$  were studied by vary  $V_{\text{HCl}}/V_{\text{C}_2\text{H}_2}$  from 1.05 to 1.20 (shown in Figure R1c and d). For acetylene hydrochlorination reaction, excessive content of HCl compared with  $\text{C}_2\text{H}_2$  can inhibit the formation of carbon deposition by the polymerization of  $\text{C}_2\text{H}_2$  and VCM<sup>23</sup>. When the ratio of  $V_{\text{HCl}}/V_{\text{C}_2\text{H}_2}$  increased from 1.05 to 1.15, the acetylene conversion is gradually increased from 65% to 84%, whereas it is decreased to 78% when the  $V_{\text{HCl}}/V_{\text{C}_2\text{H}_2}$  equals 1.20. Although the VCM selectivity is the lowest as  $V_{\text{HCl}}/V_{\text{C}_2\text{H}_2} = 1.15$ , it is still over 99% after several hour reaction. Thus, the optimal  $V_{\text{HCl}}/V_{\text{C}_2\text{H}_2}$  was set at 1.15.

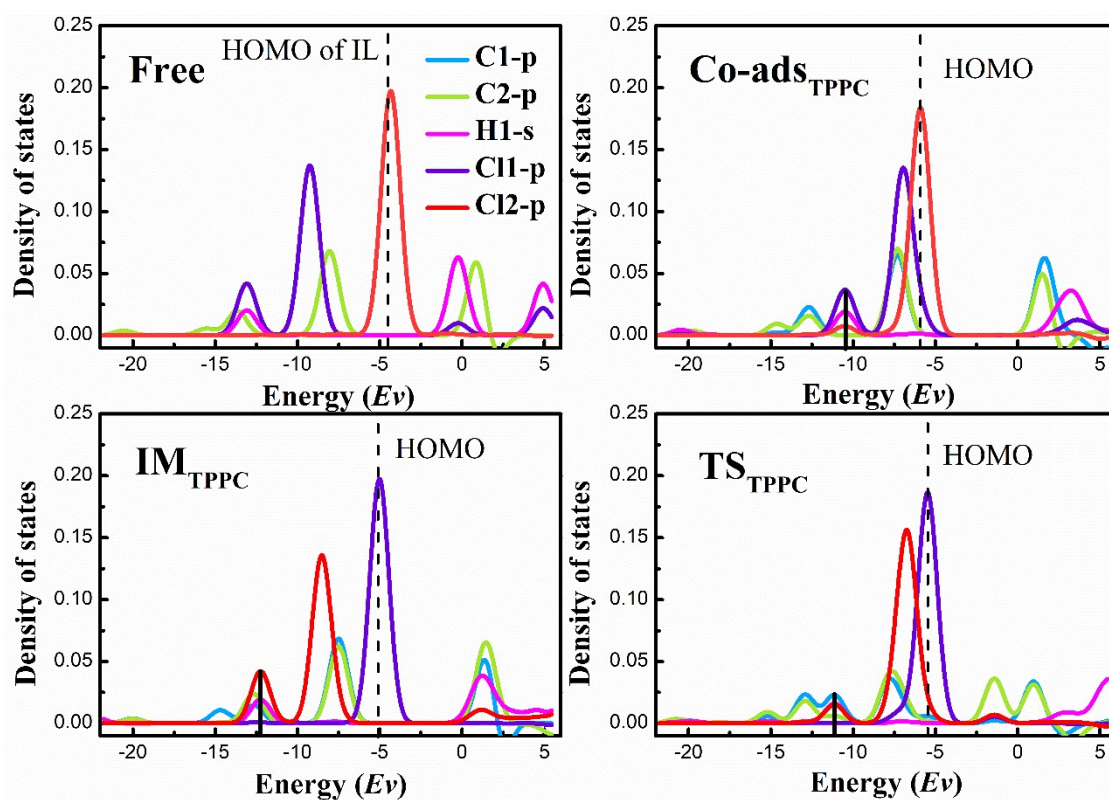

Figure S6. PDOS of catalytic reaction process on TPPC

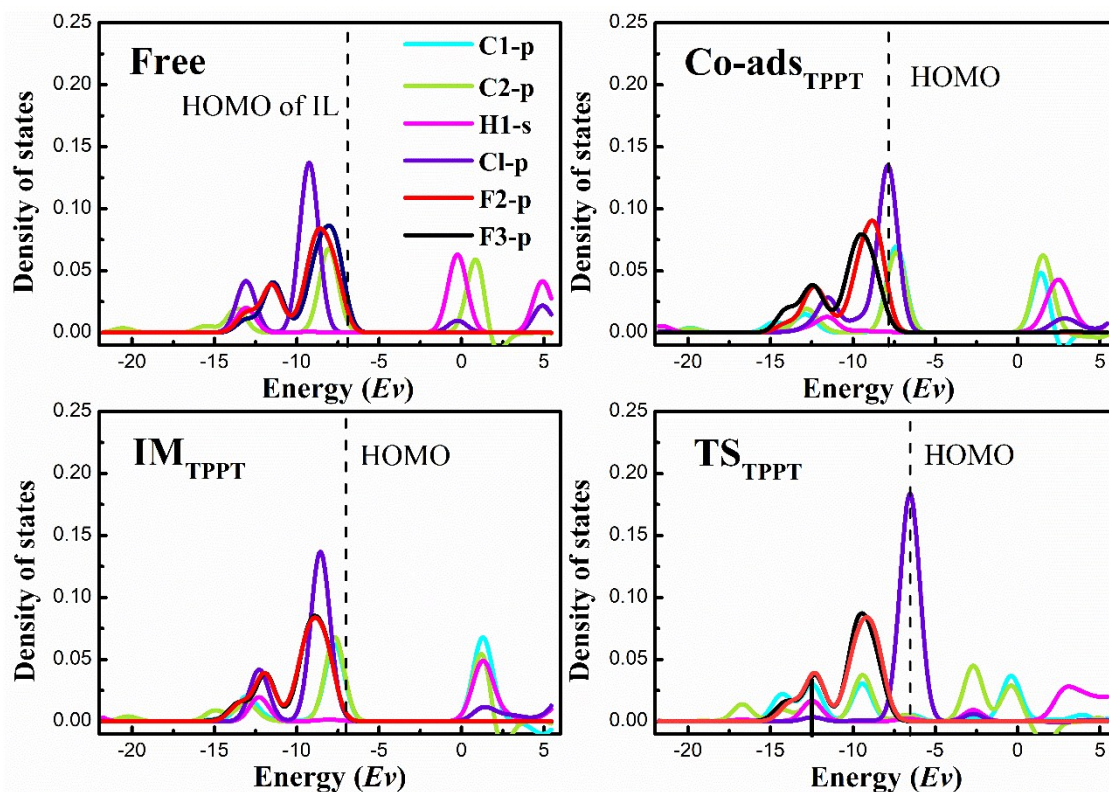

Figure S7. PDOS of catalytic reaction process on TPPT

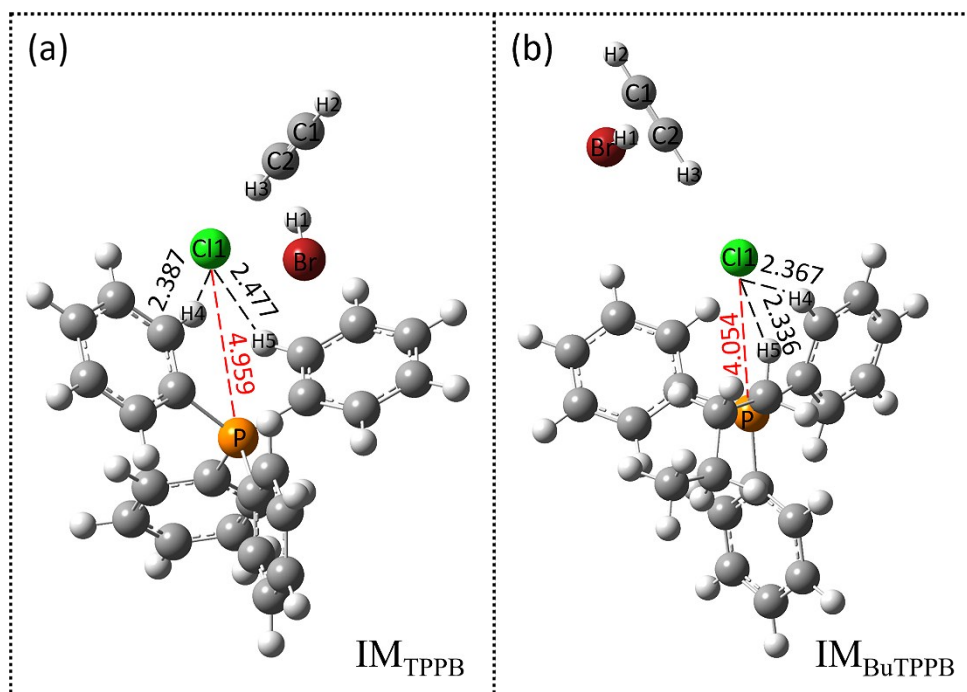

**Figure S8.** Hydrogen bonds in  $IM_{TPPB}$  and  $IM_{TPPT}$  configurations

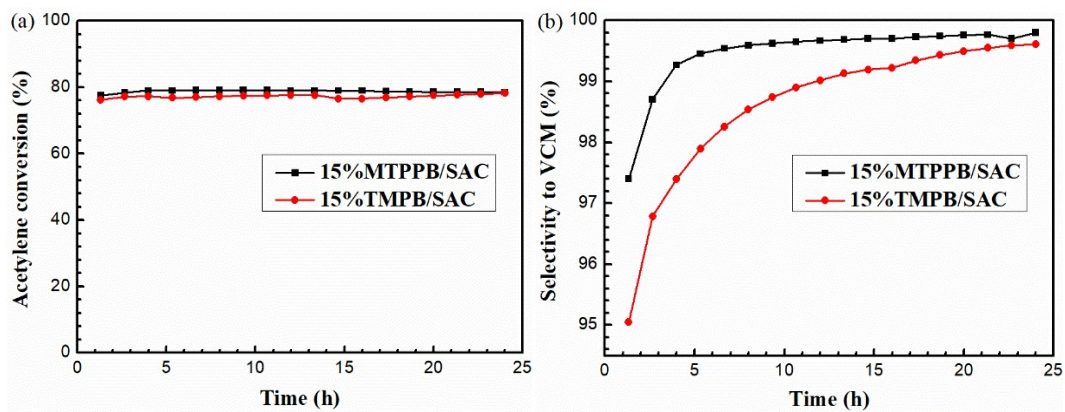

**Figure S9.**  $C_2H_2$  conversion (a) and VCM selectivity (b) over 15%MTPPB/SAC and 15%TMPB/SAC catalysts under reaction conditions of  $T = 453\text{ K}$ ,  $GHSV(C_2H_2) = 50\text{ h}^{-1}$  and  $V_{HCl}/V_{C_2H_2} = 1.15$ .

## Reference:

1. S. J. Cornforth, R. H. Cornforth and R. T. Gray, *Journal of the Chemical Society, Faraday Transactions*, 1982, **1**, 2289-2297
2. V. G. Wittig and G. Geissler, *Aus dem Chemischen Institut der Universitat Tubingen*, 1953, 44-57
3. A. Hercouet and M. L. Corre, *Phosphorous and Sulfur and the Related Elements*, 1987, **29**, 111-113.
4. V. V. Grushin, I. I. Demkina and T. P. Tolstaya, *Inorganic Chemistry*, 1991, **30**, 1760-1765.
5. K. Dong, X. Liu, H. Dong, X. Zhang and S. Zhang, *Chemical Reviews*, 2017, **117**, 6636-6695.
6. F. Giacalone, M. Gruttadauria, *ChemCatChem*, 2016, **8**, 664-684.
7. X. Li, X. Pan, L. Yu, P. Ren, X. Wu, L. Sun, F. Jiao and X. Bao, *Nature Communications*, 2014, **5**, 3688-3695.
8. X. Li, Y. Wang, L. Kang, M. Zhu and B. Dai, *Journal of Catalysis*, 2014, **311**, 288-294.
9. X. Li, X. Pan and X. Bao, *Journal of Energy Chemistry*, 2014, **23**, 131-135.
10. S. Chao, F. Zou, F. Wan, X. Dong, Y. Wang, Y. Wang, Q. Guan, G. Wang and W. Li, *Scientific Reports*, 2017, **7**, 39789-39795.
11. X. Li, J. Zhang and W. Li, *Journal of Industrial and Engineering Chemistry*, 2016, **44**, 146-154.
12. Y. Yang, G. Lan, X. Wang and Y. Li, *Chinese Journal of Catalysis*, 2016, **37**, 1242-1248.
13. T. Zhang, J. Zhao, J. Xu, J. Xu, X. Di and X. Li, *Chinese Journal of Chemical Engineering*, 2016, **24**, 484-490.
14. X. Li, J. Zhang, Y. Han, M. Zhu, S. Shang and W. Li, *Journal of Materials Science*, 2017, **53**, 4913-4926.
15. X. Li, P. Li, X. Pan, H. Ma and X. Bao, *Applied Catalysis B: Environmental*, 2017, **210**, 116-120.
16. X. Dong, S. Chao, F. Wan, Q. Guan, G. Wang and W. Li, *Journal of Catalysis*, 2018, **359**, 161-170.
17. P. Li, H. Li, X. Pan, K. Tie, T. Cui, M. Ding and X. Bao, *ACS Catalysis*, 2017, **7**, 8572-8577.
18. X. Wei, H. Shi, W. Qian, G. Luo, Y. Jin and F. Wei, *Industrial & Engineering Chemistry Research*, 2009, **48**, 128-133.
19. H. Bremer and H. Lieske, *Applied Catalysis*, 1985, **18**, 191-203.
20. P. Johnston, N. Carthey and G. J. Hutchings, *Journal of the American Chemical Society*, 2015, **137**, 14548-14557.
21. J. Zhao, Y. Yu, X. Xu, S. Di, B. Wang, H. Xu, J. Ni, L. Guo, Z. Pan and X. Li, *Applied Catalysis B: Environmental*, 2017, **206**, 175-183.
22. H. Dai, M. Zhu, H. Zhang, F. Yu, C. Wang and B. Dai, *Journal of Industrial and Engineering Chemistry*, 2017, **50**, 72-78.
23. X. Li, J. Zhang and W. Li, *Journal of Industrial and Engineering Chemistry*, 2016, **44**, 146-154.
